# Supplementary material for: Analysis of gene expression in a developmental context emphasizes distinct biological leitmotifs in human cancers
Source: Springer Nature journal article supplement (doi:10.1186/gb-2008-9-7-r108), 2008-07-08

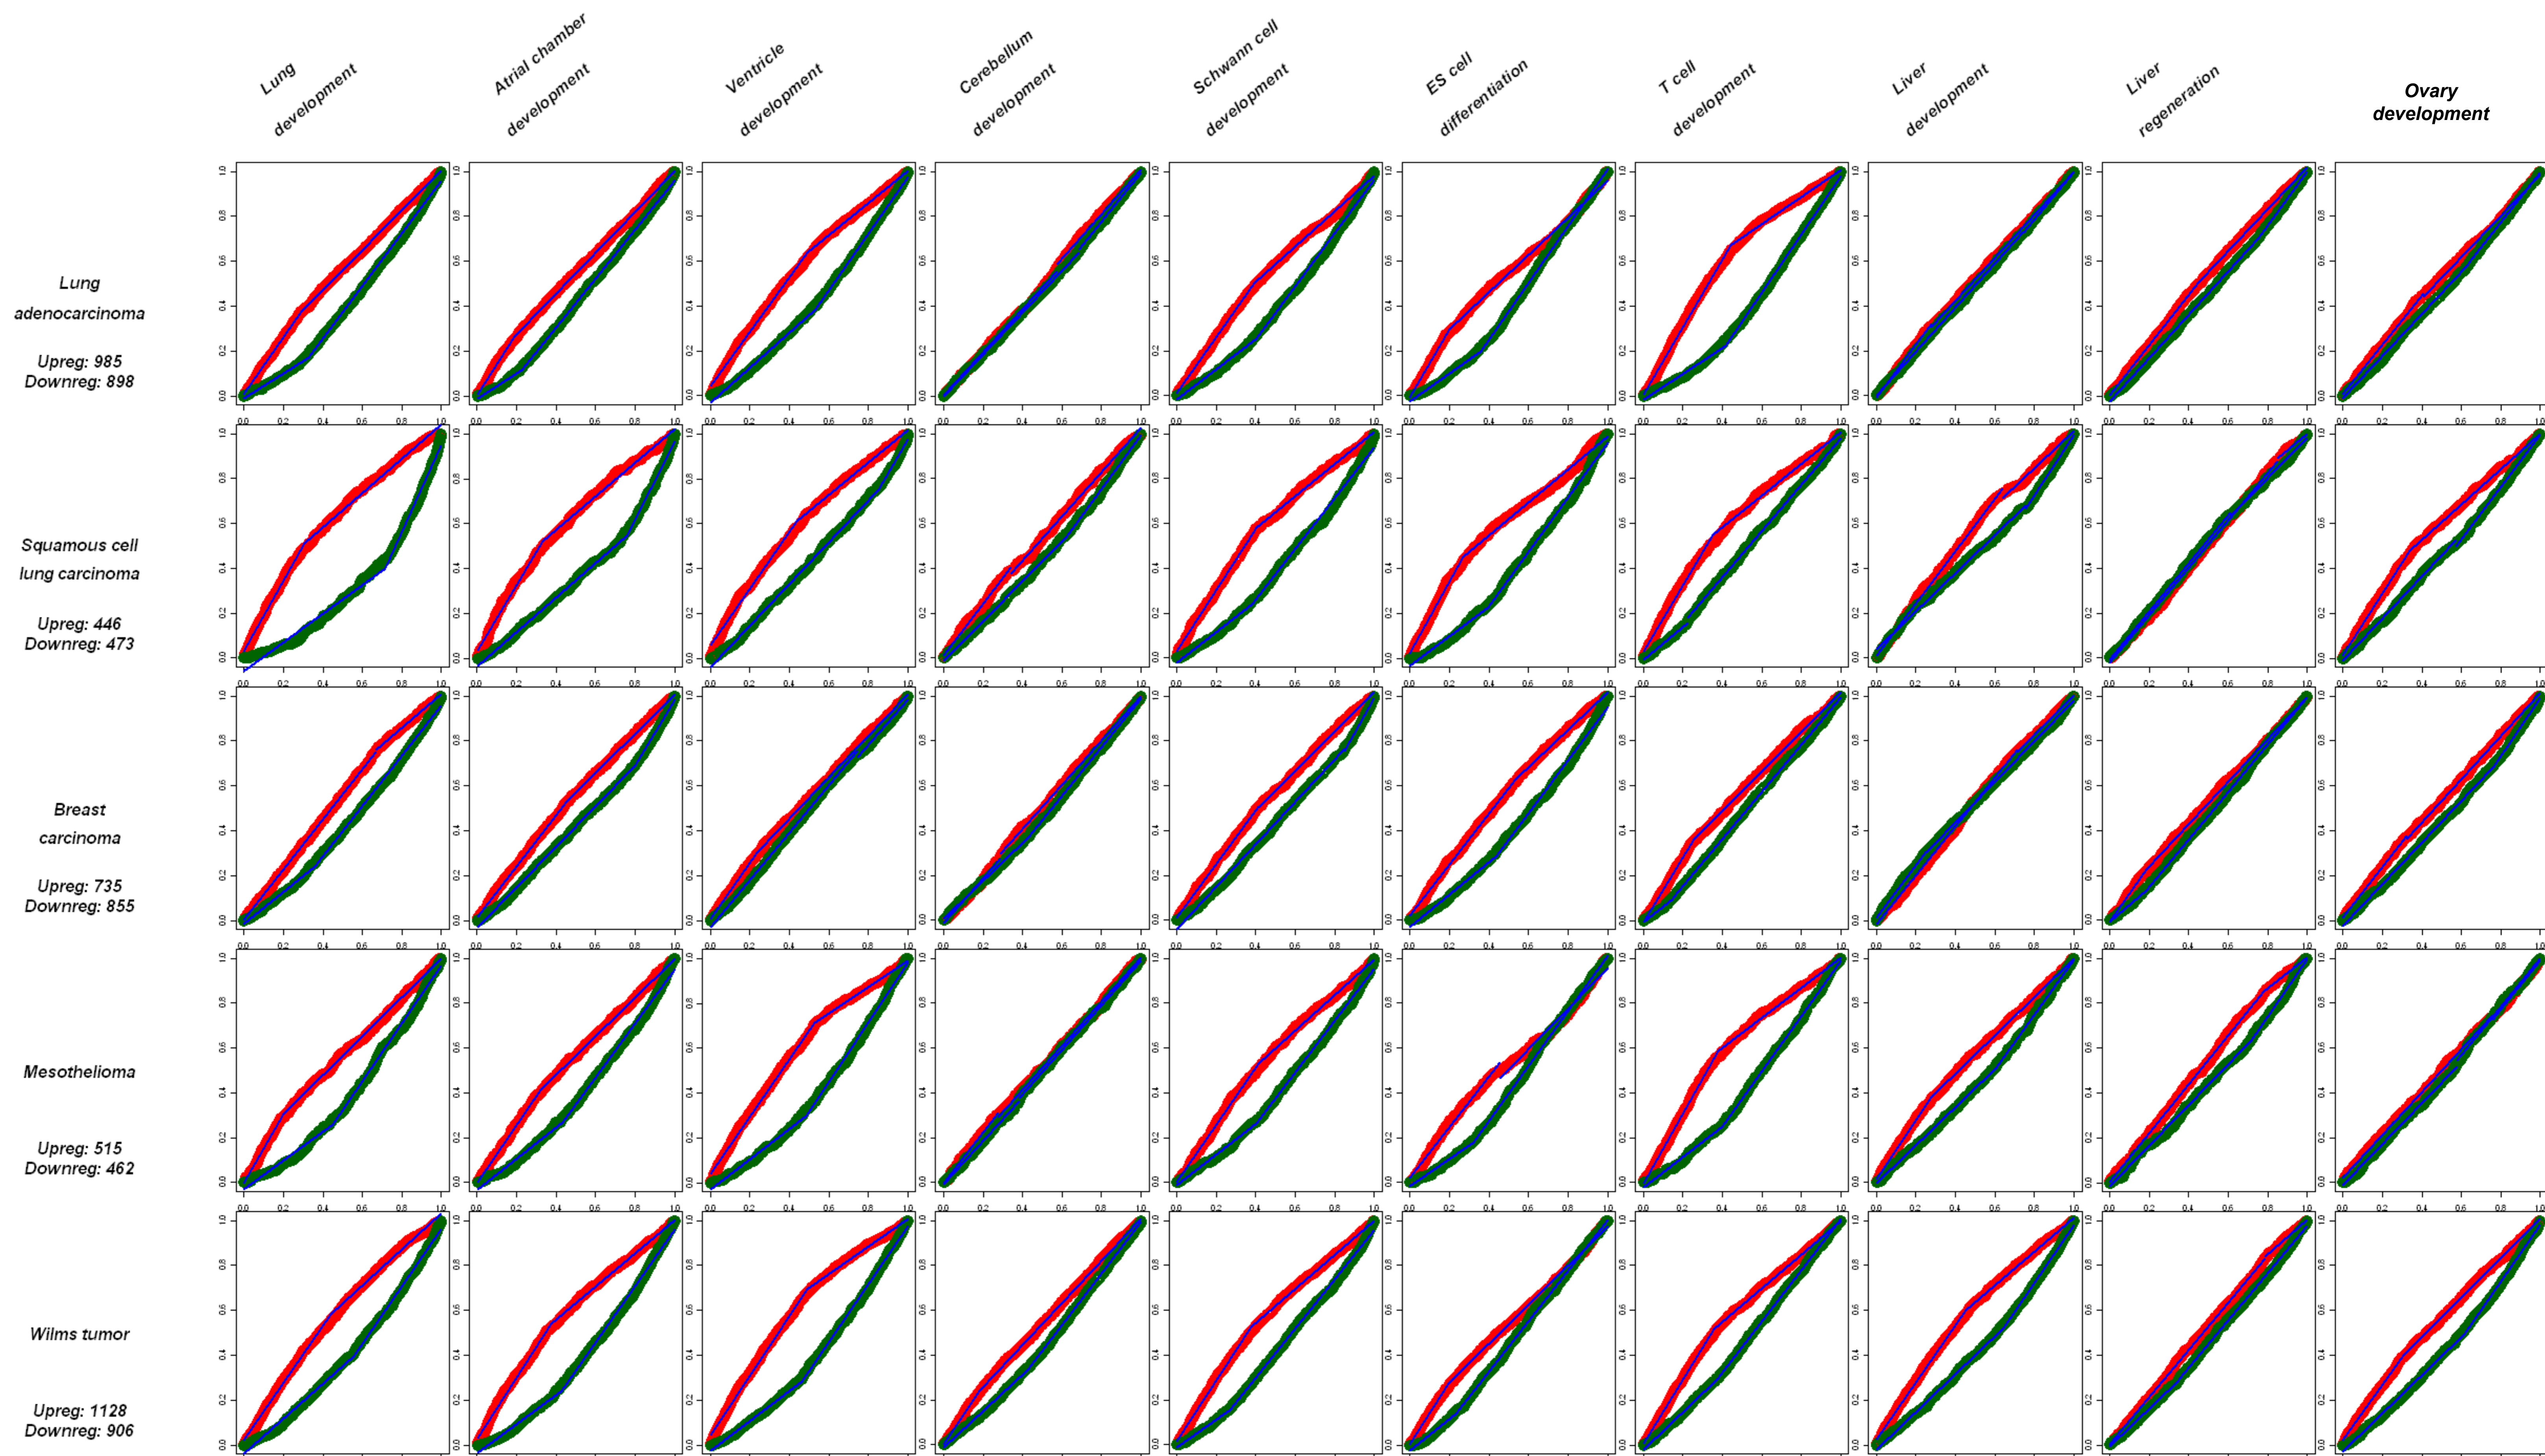

Lung development    Atrial chamber development    Ventricle development    Cerebellum development    Schwann cell development    ES cell differentiation    T cell development    Liver development    Liver regeneration    Ovary development

*Advanced HCC*  
Upreg: 850  
Downreg: 719

*Early stage HCC*  
Upreg: 447  
Downreg: 481

*Astrocytoma*  
Upreg: 1098  
Downreg: 831

*Glioblastoma*  
Upreg: 1418  
Downreg: 1048

*Oligodendroglioma*  
Upreg: 983  
Downreg: 970

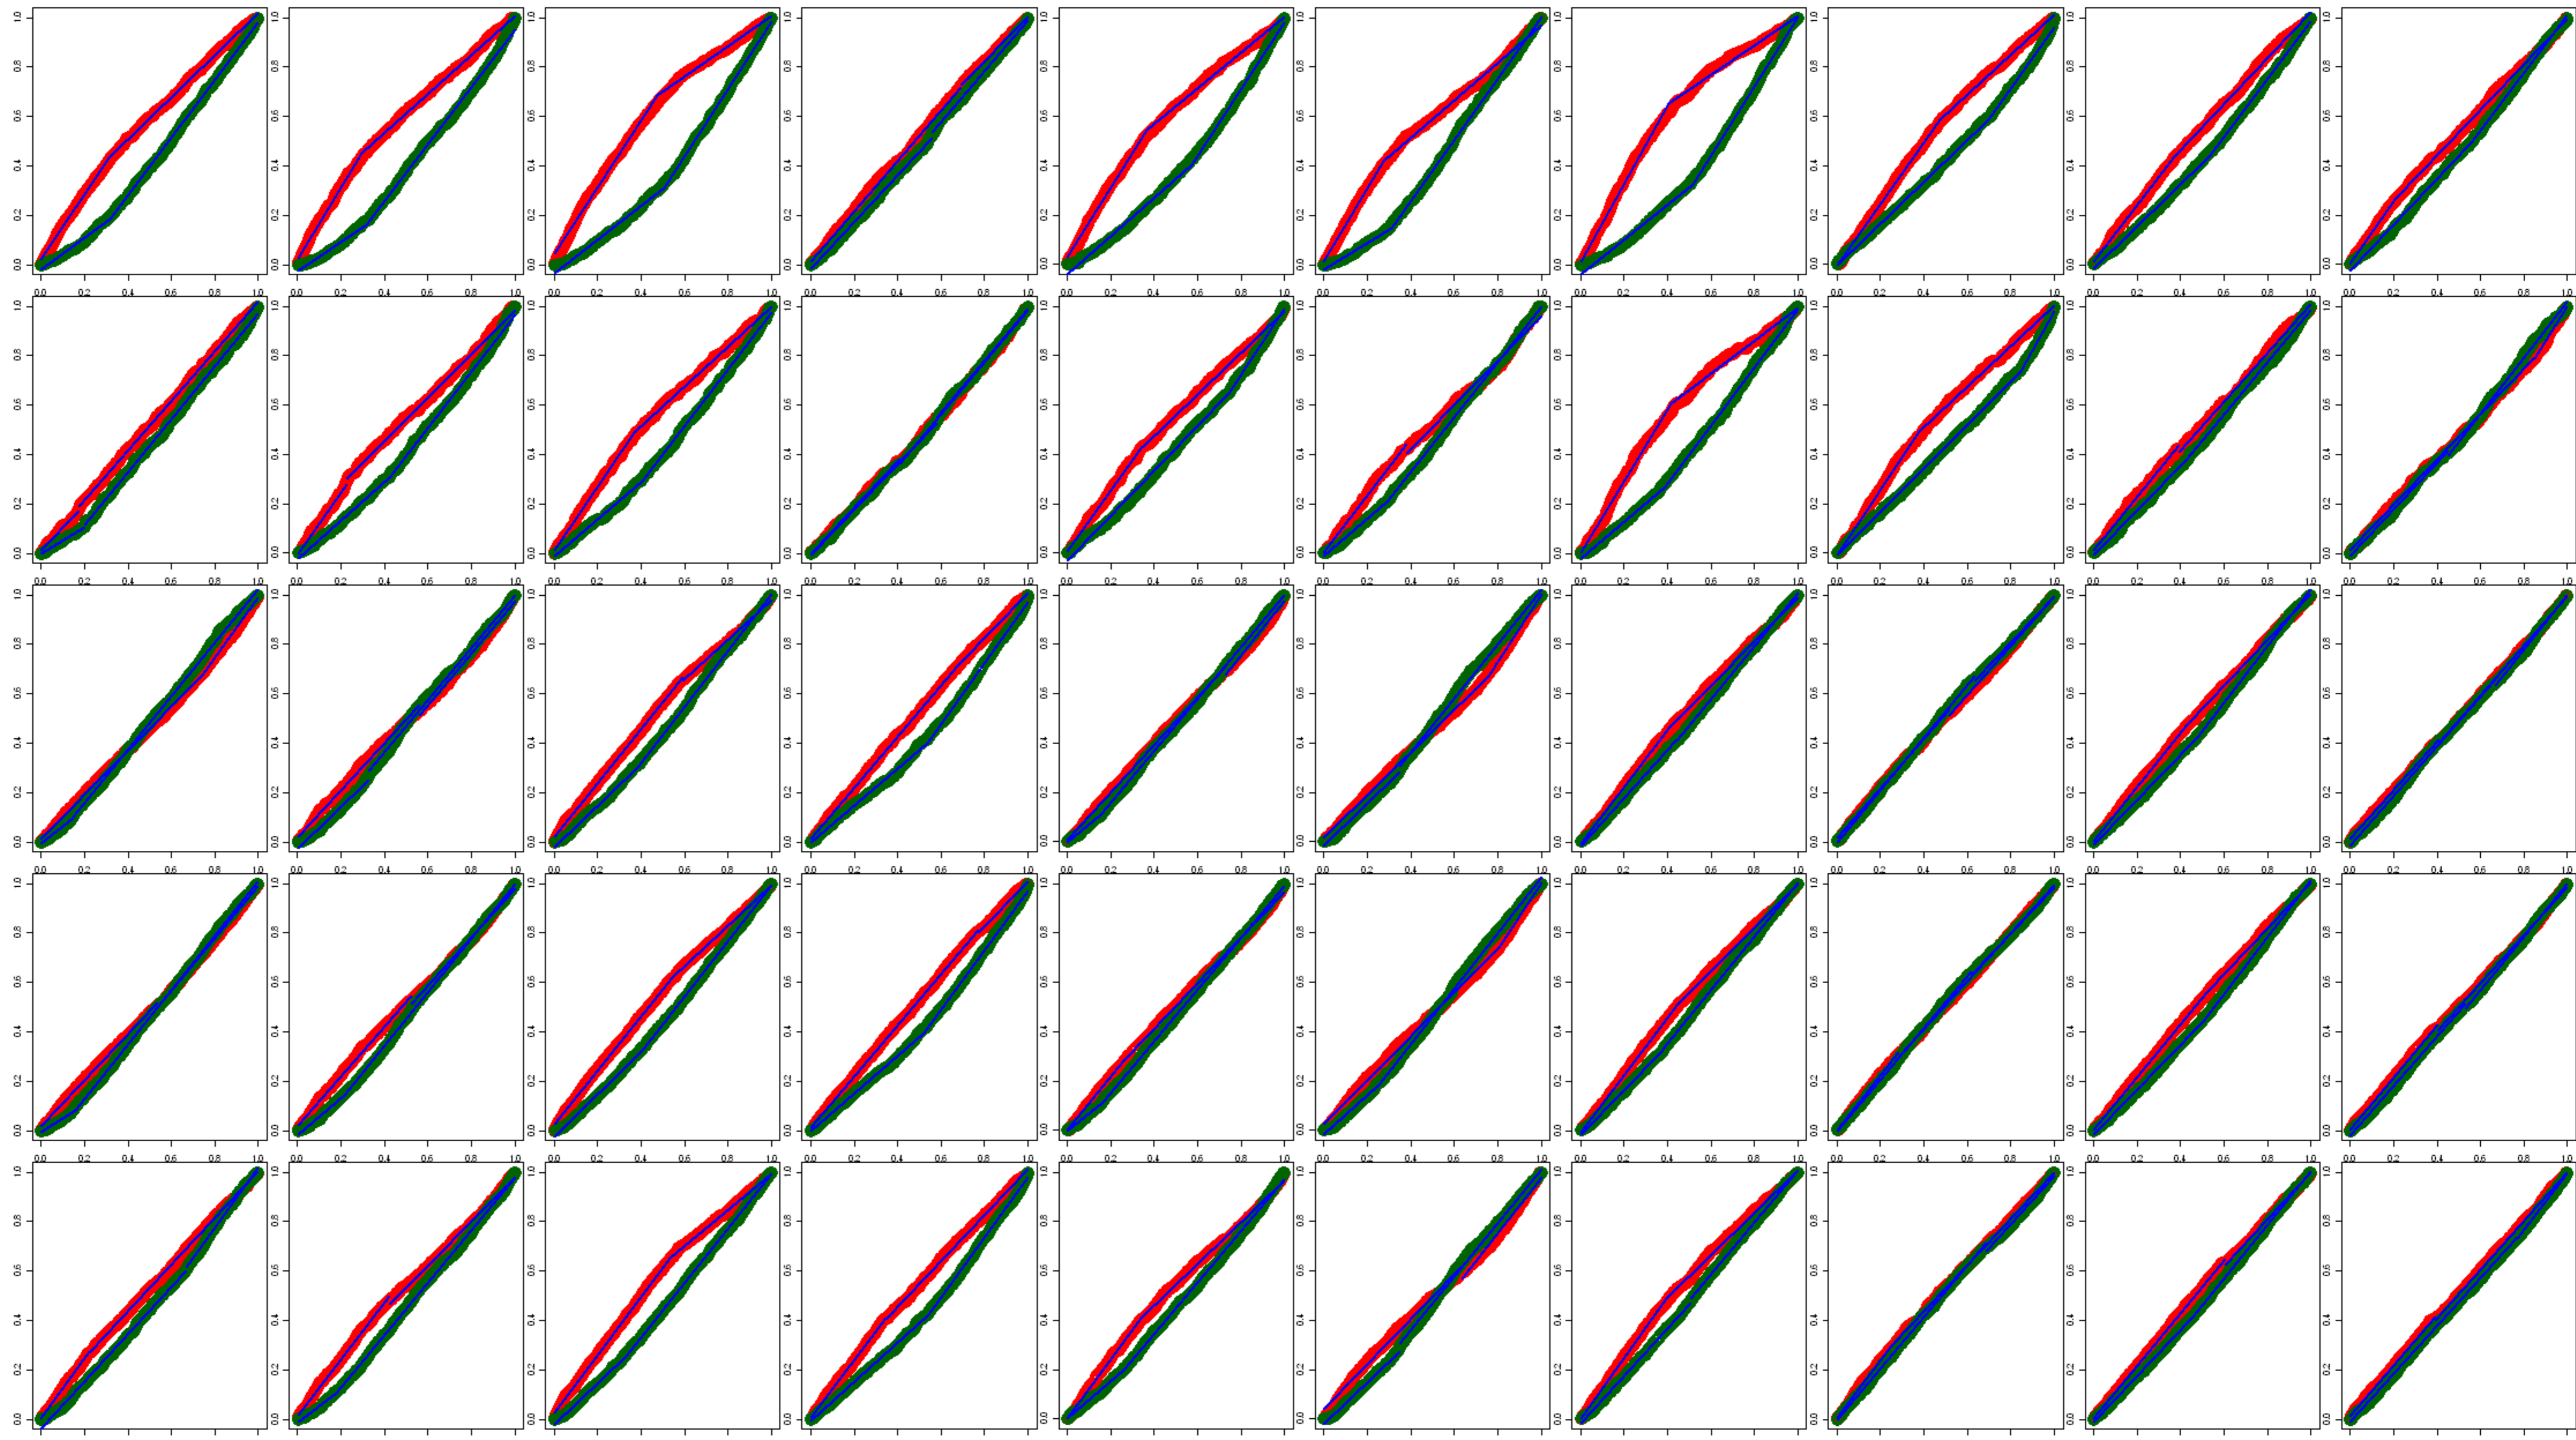

Lung development    Atrial chamber development    Ventricle development    Cerebellum development    Schwann cell development    ES cell differentiation    T cell development    Liver development    Liver regeneration    Ovary development

*Prostate carcinoma*

Upreg: 818  
Downreg: 875

*T-cell lymphoma*

Upreg: 1434  
Downreg: 1016

*Mucinous ovarian cancer*

Upreg: 893  
Downreg: 968

*Serous ovarian cancer*

Upreg: 898  
Downreg: 952

*Clear cell ovarian cancer*

Upreg: 914  
Downreg: 988

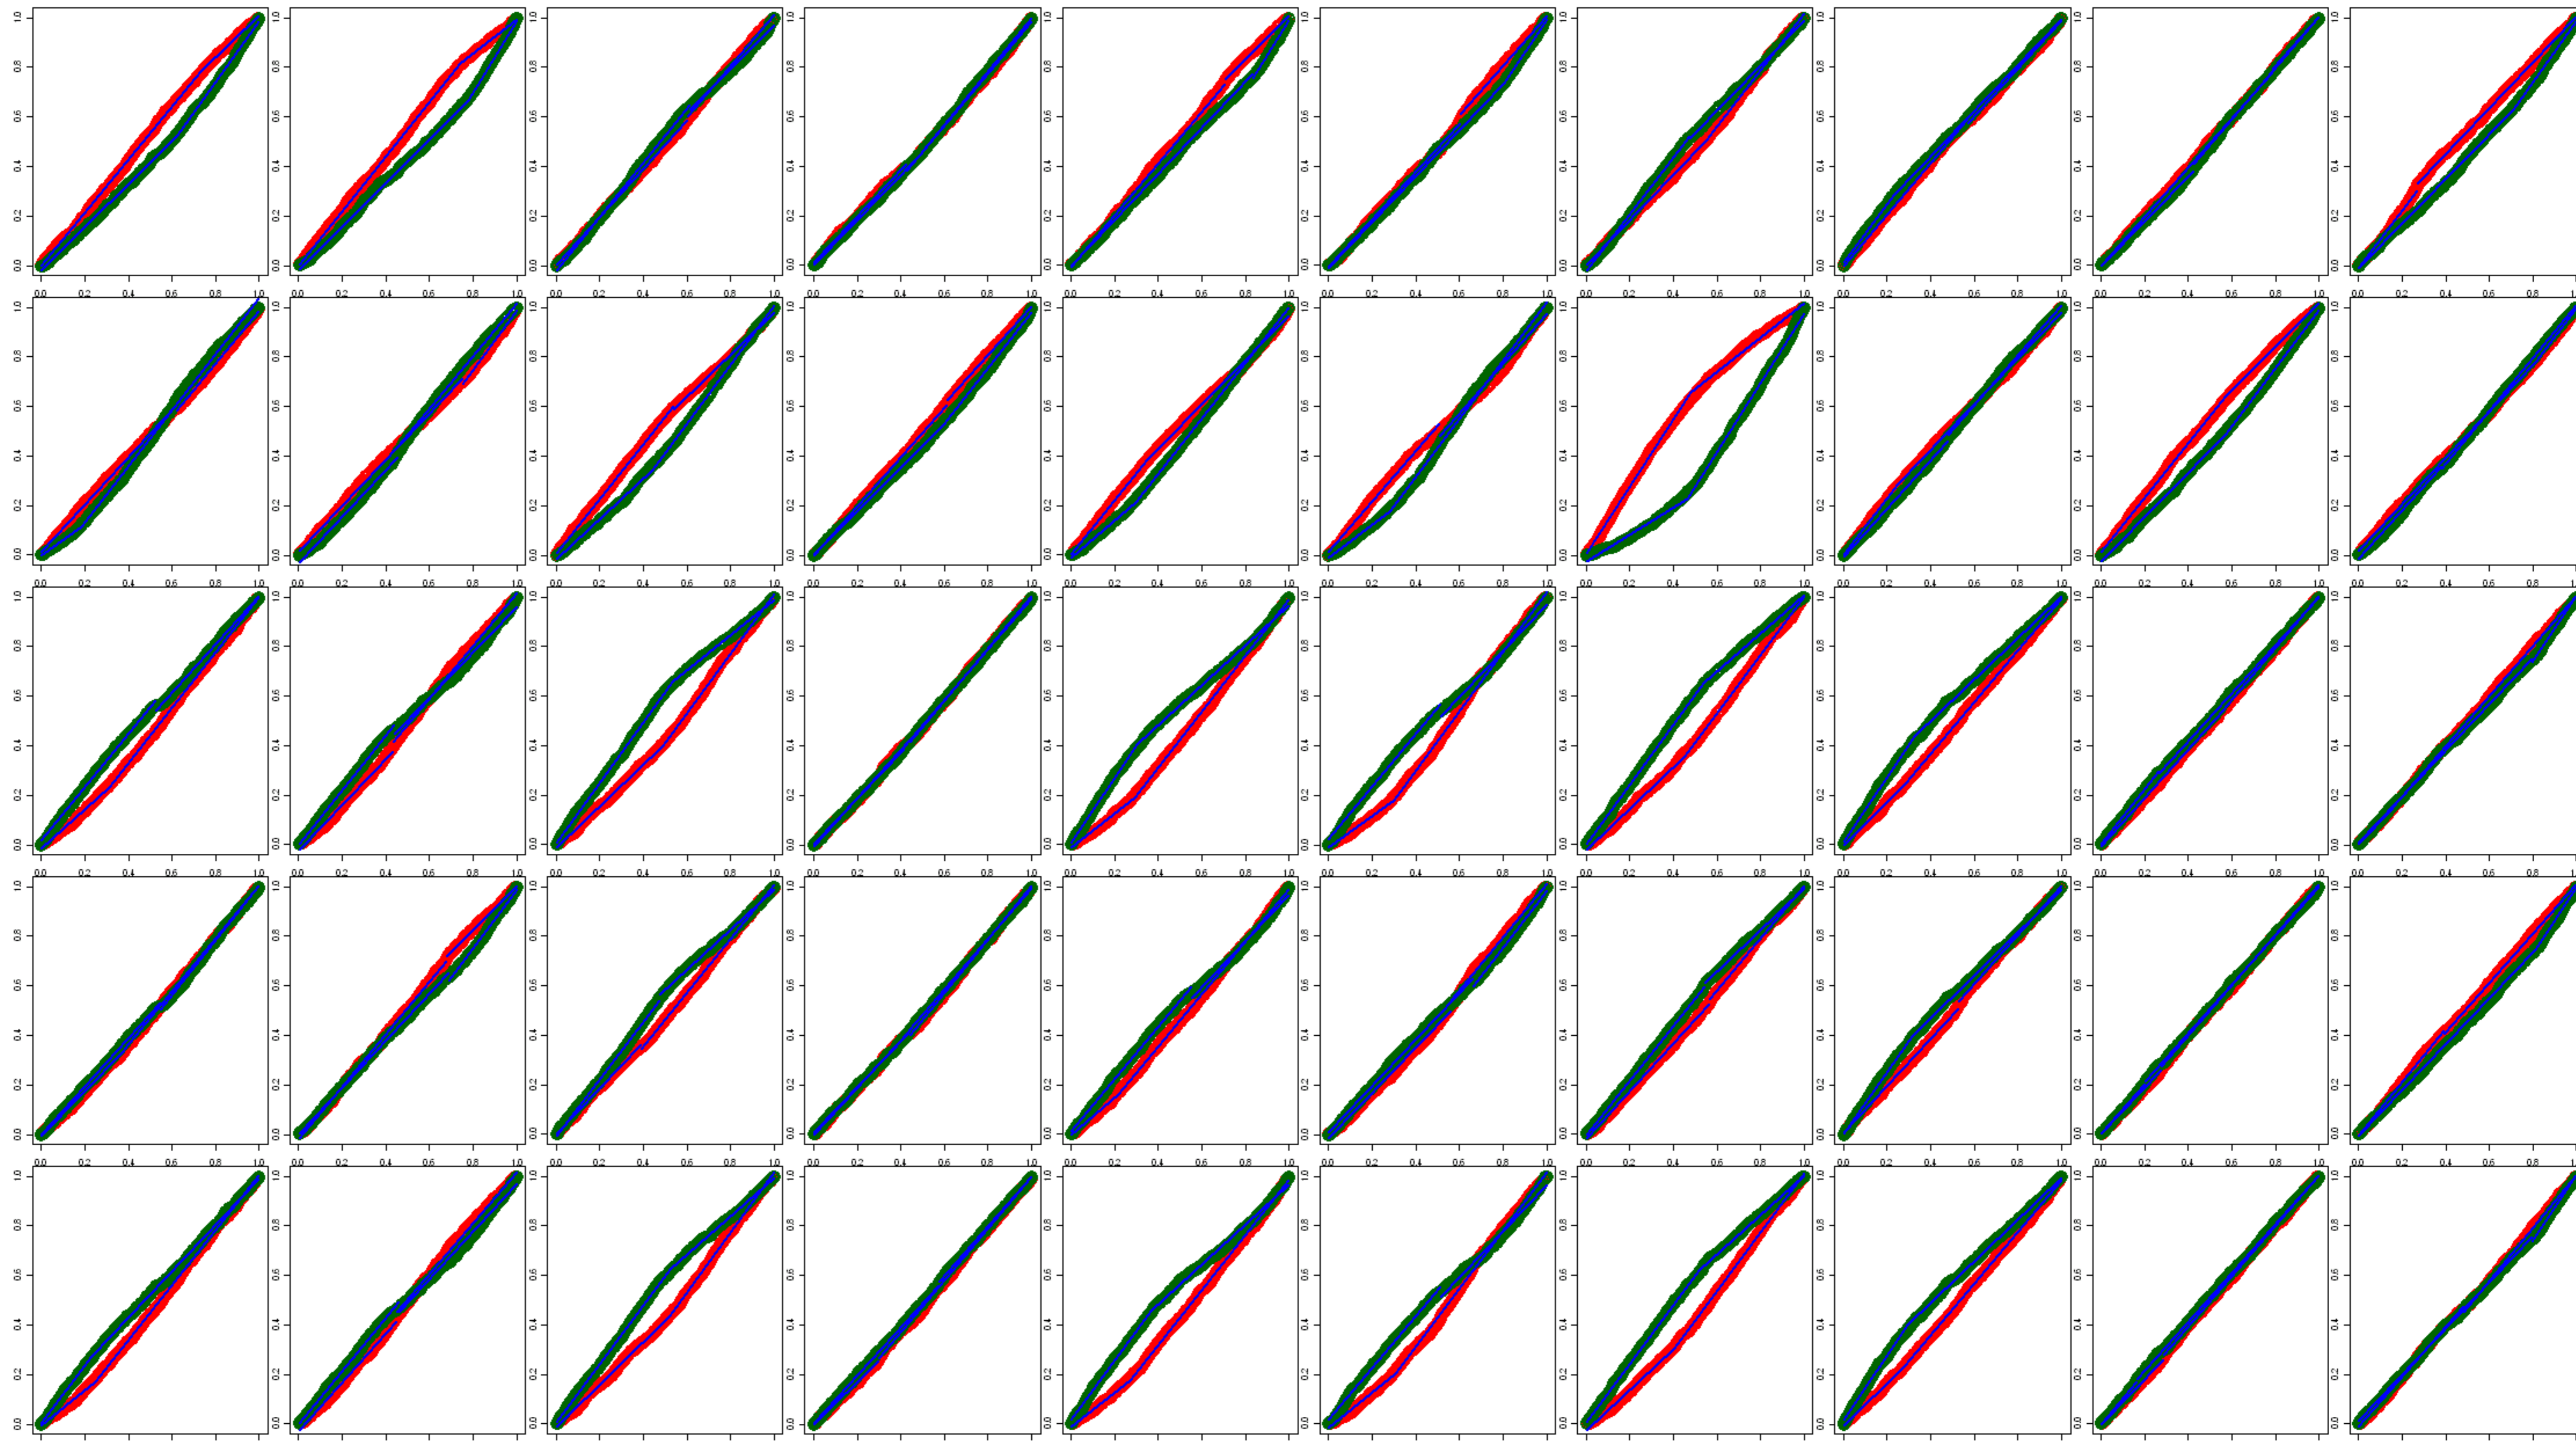

Lung development    Atrial chamber development    Ventricle development    Cerebellum development    Schwann cell development    ES cell differentiation    T cell development    Liver development    Liver regeneration    Ovary development

*Endometroid ovarian cancer*  
Upreg: 871  
Downreg: 938

*Myeloma*  
Upreg: 831  
Downreg: 533

*Adrenal adenoma*  
Upreg: 88  
Downreg: 439

*Colorectal adenoma*  
Upreg: 1247  
Downreg: 1003

*PEN vs ESEN*  
Upreg: 273  
Downreg: 214

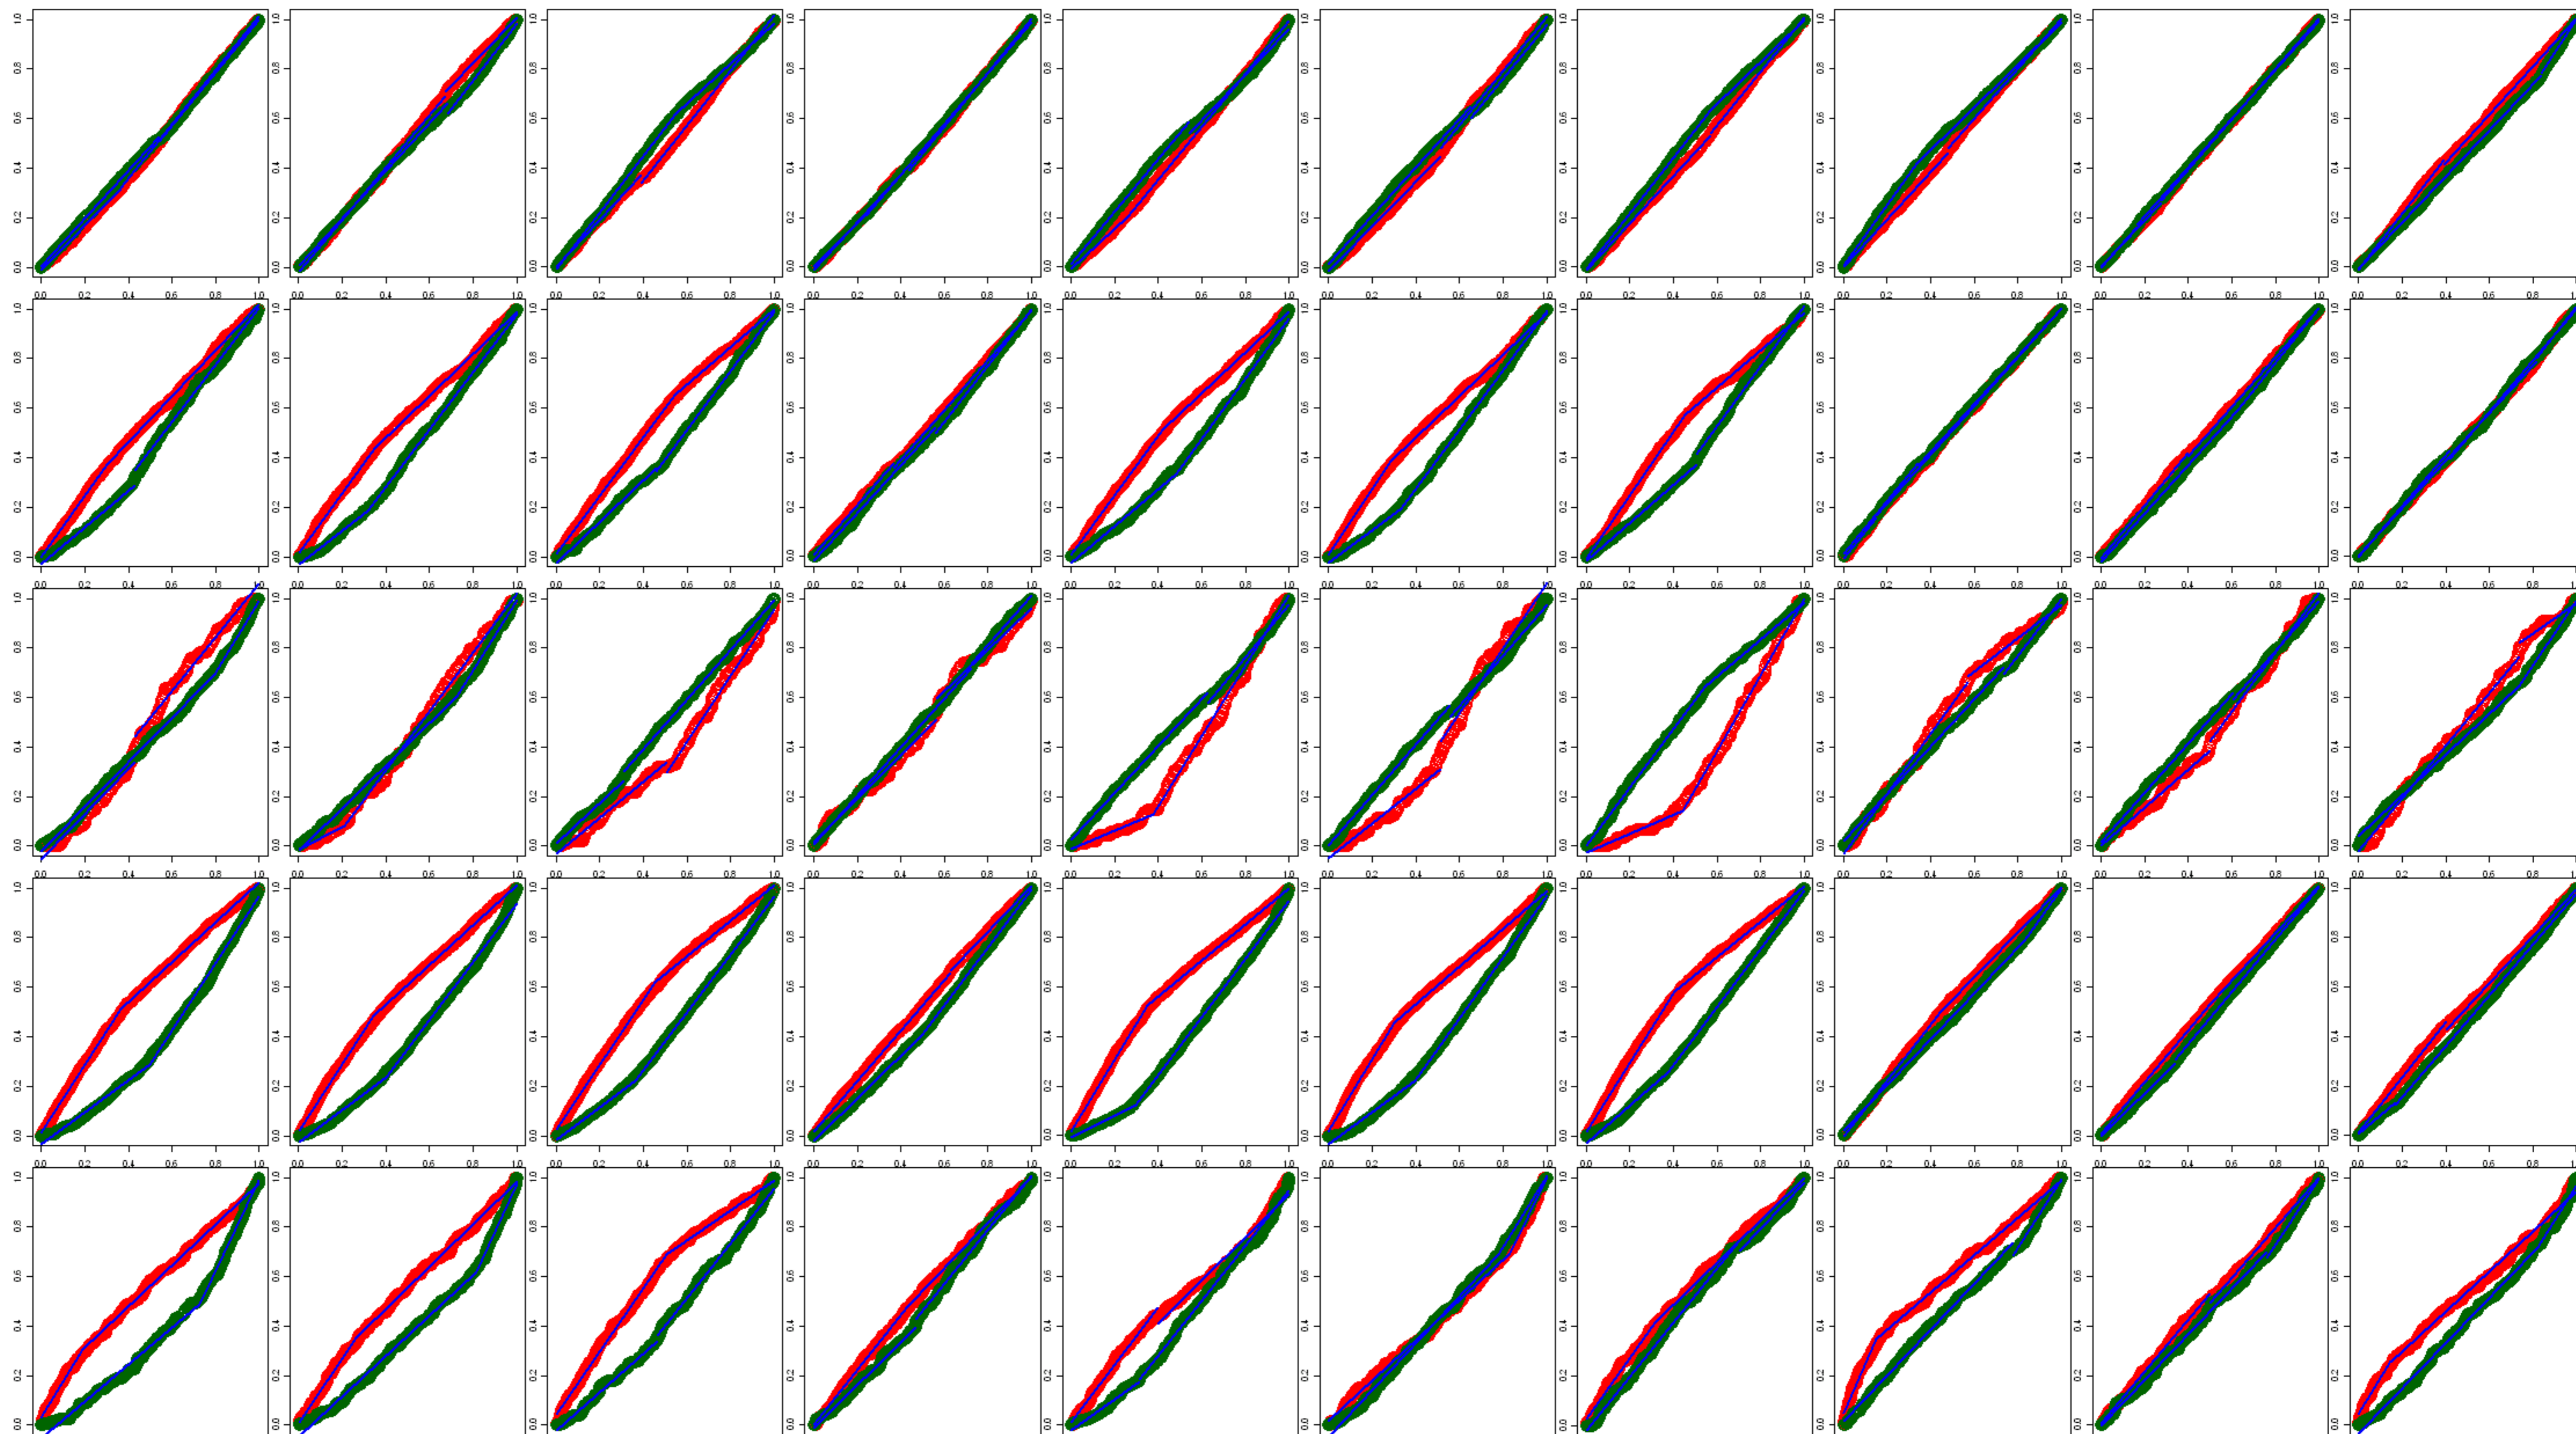

Lung development    Atrial chamber development    Ventricle development    Cerebellum development    Schwann cell development    ES cell differentiation    T cell development    Liver development    Liver regeneration    Ovary development

*PEN vs MSEN*

*Upreg: 448  
Downreg: 400*

*MSEN vs ESEN*

*Upreg: 147  
Downreg: 249*

*UBC 1*

*Upreg: 1279  
Downreg: 1006*

*UBC 2  
low grade*

*Upreg: 302  
Downreg: 274*

*UBC 2  
high grade inv*

*Upreg: 393  
Downreg: 309*

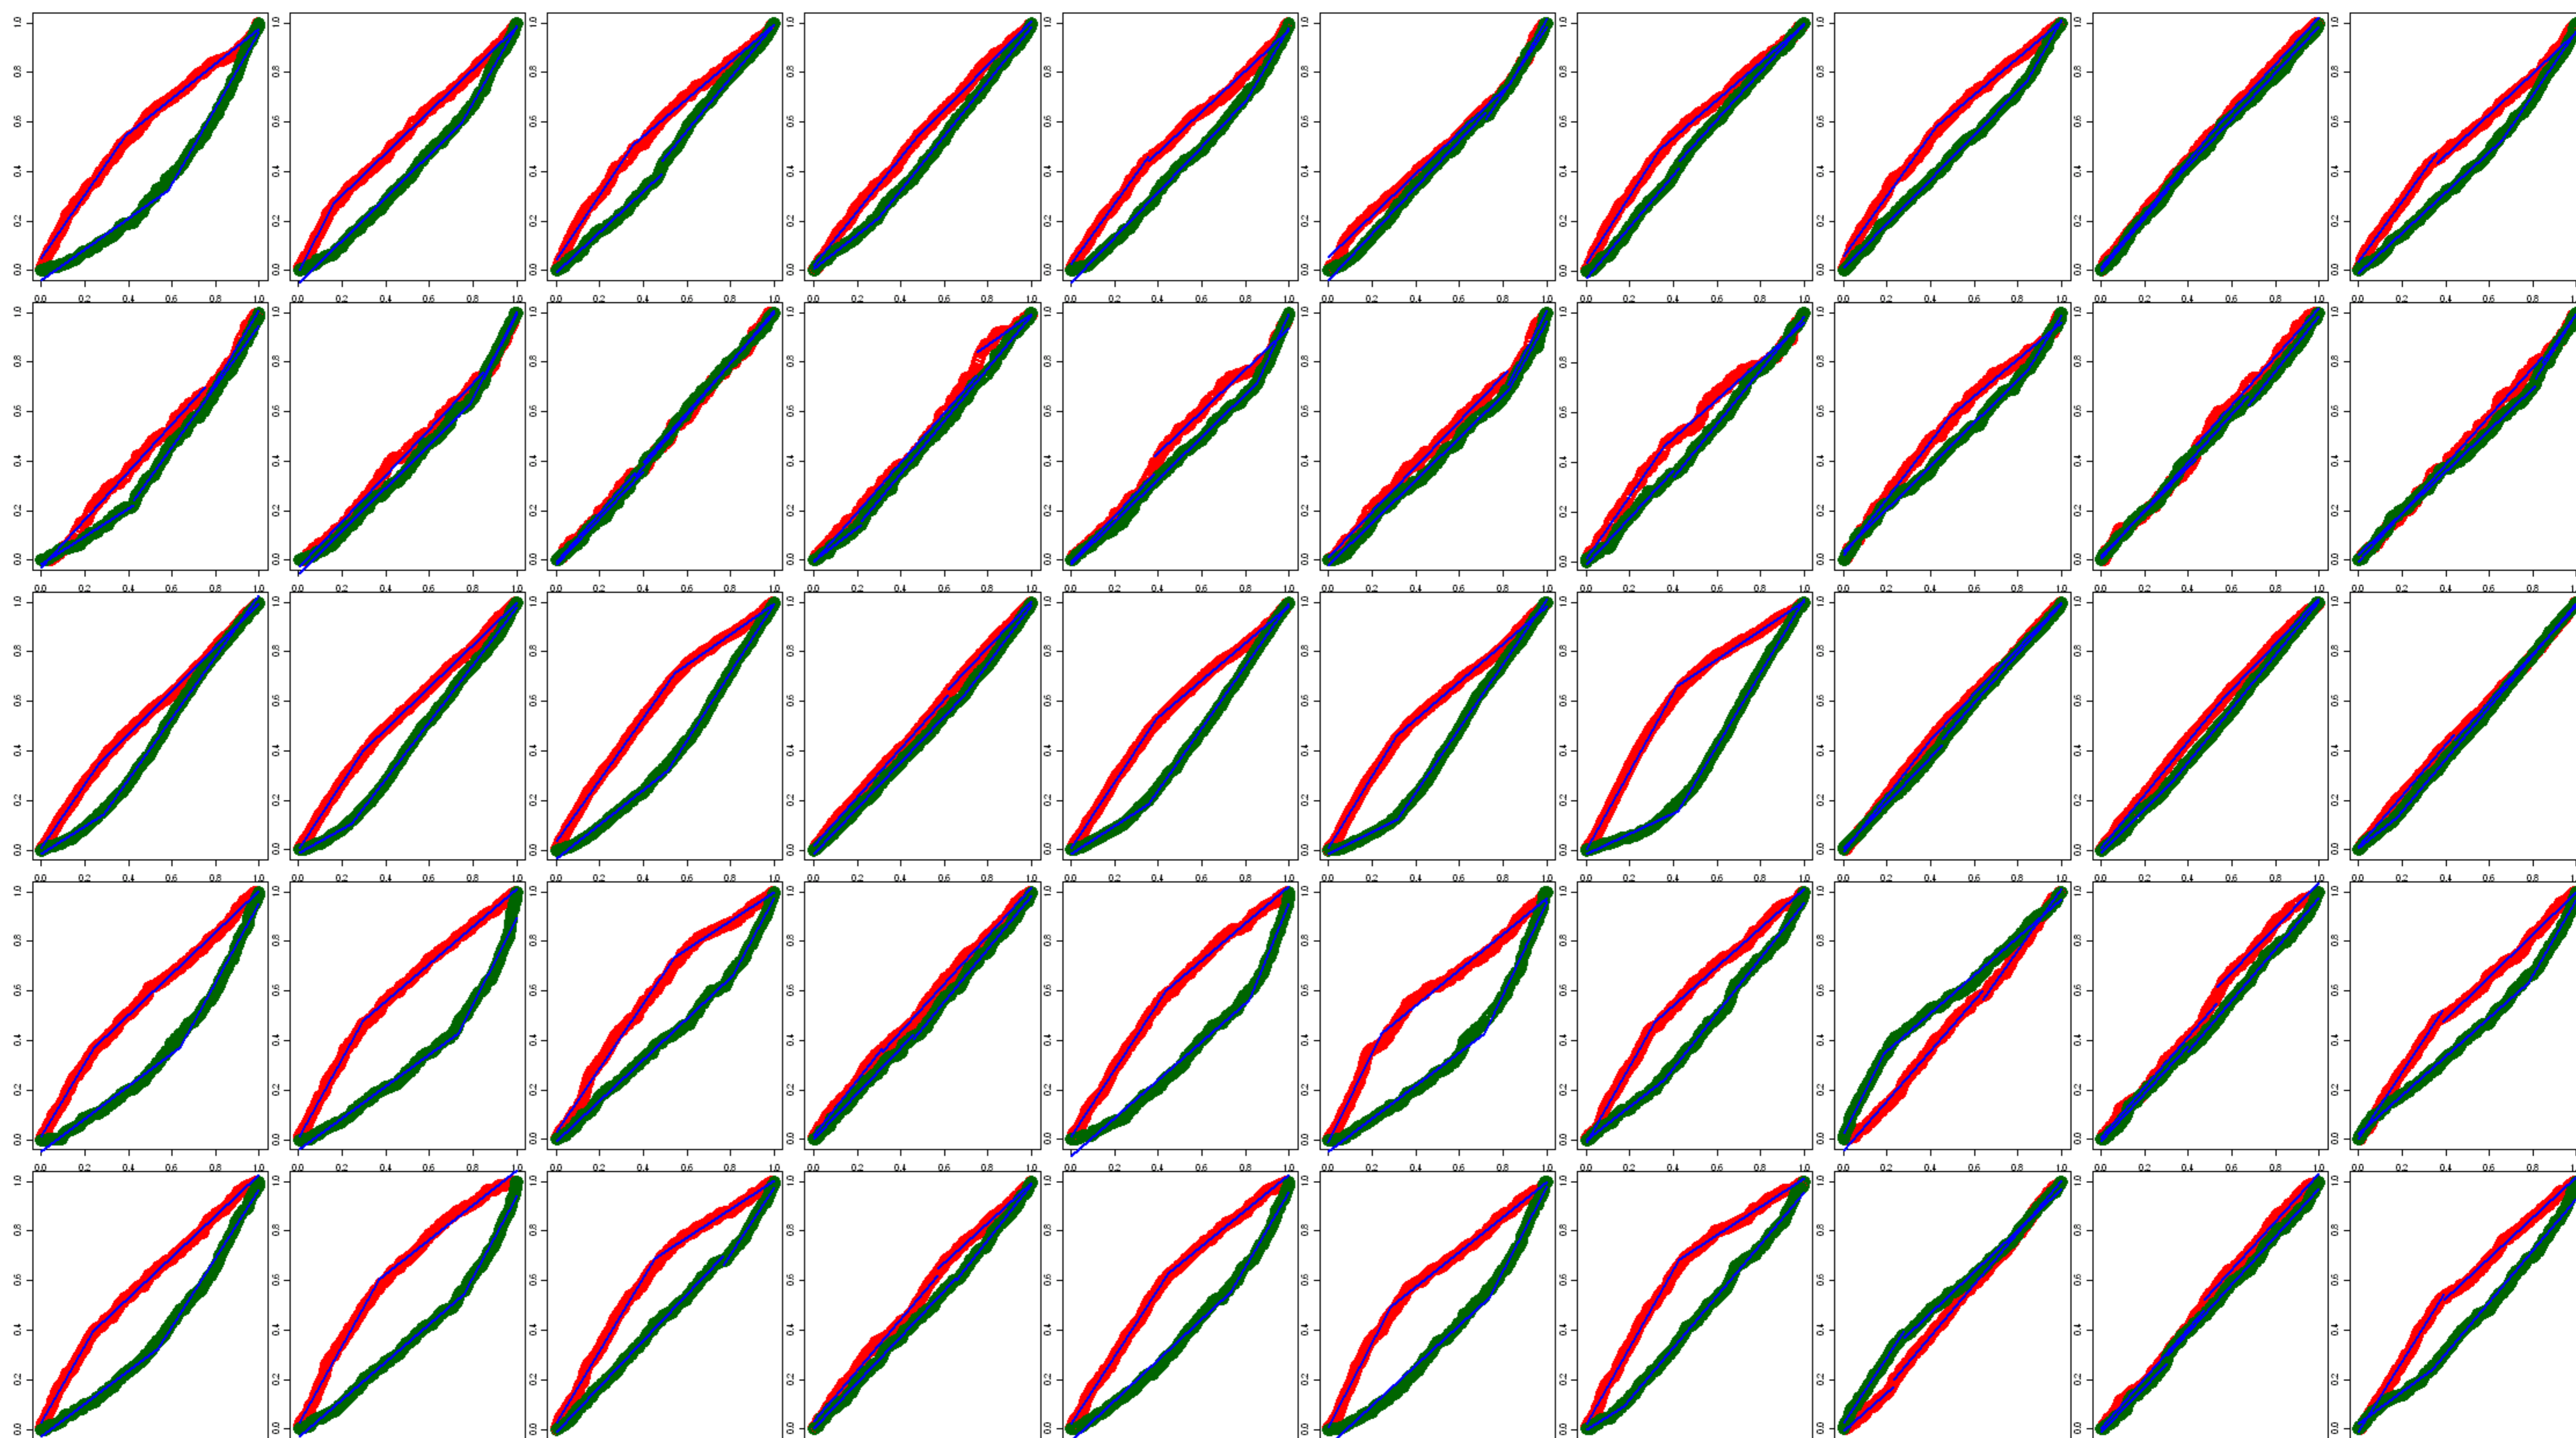

Lung development    Atrial chamber development    Ventricle development    Cerebellum development    Schwann cell development    ES cell differentiation    T cell development    Liver development    Liver regeneration    Ovary development

PRCC  
Subtype1  
Upreg: 756  
Downreg: 907

PRCC  
Subtype 1.2A  
Upreg: 270  
Downreg: 456

PRCC  
Subtype 2  
Upreg: 755  
Downreg: 743

CRCC 1  
Upreg: 1049  
Downreg: 1136

CRCC 2  
Upreg: 683  
Downreg: 713

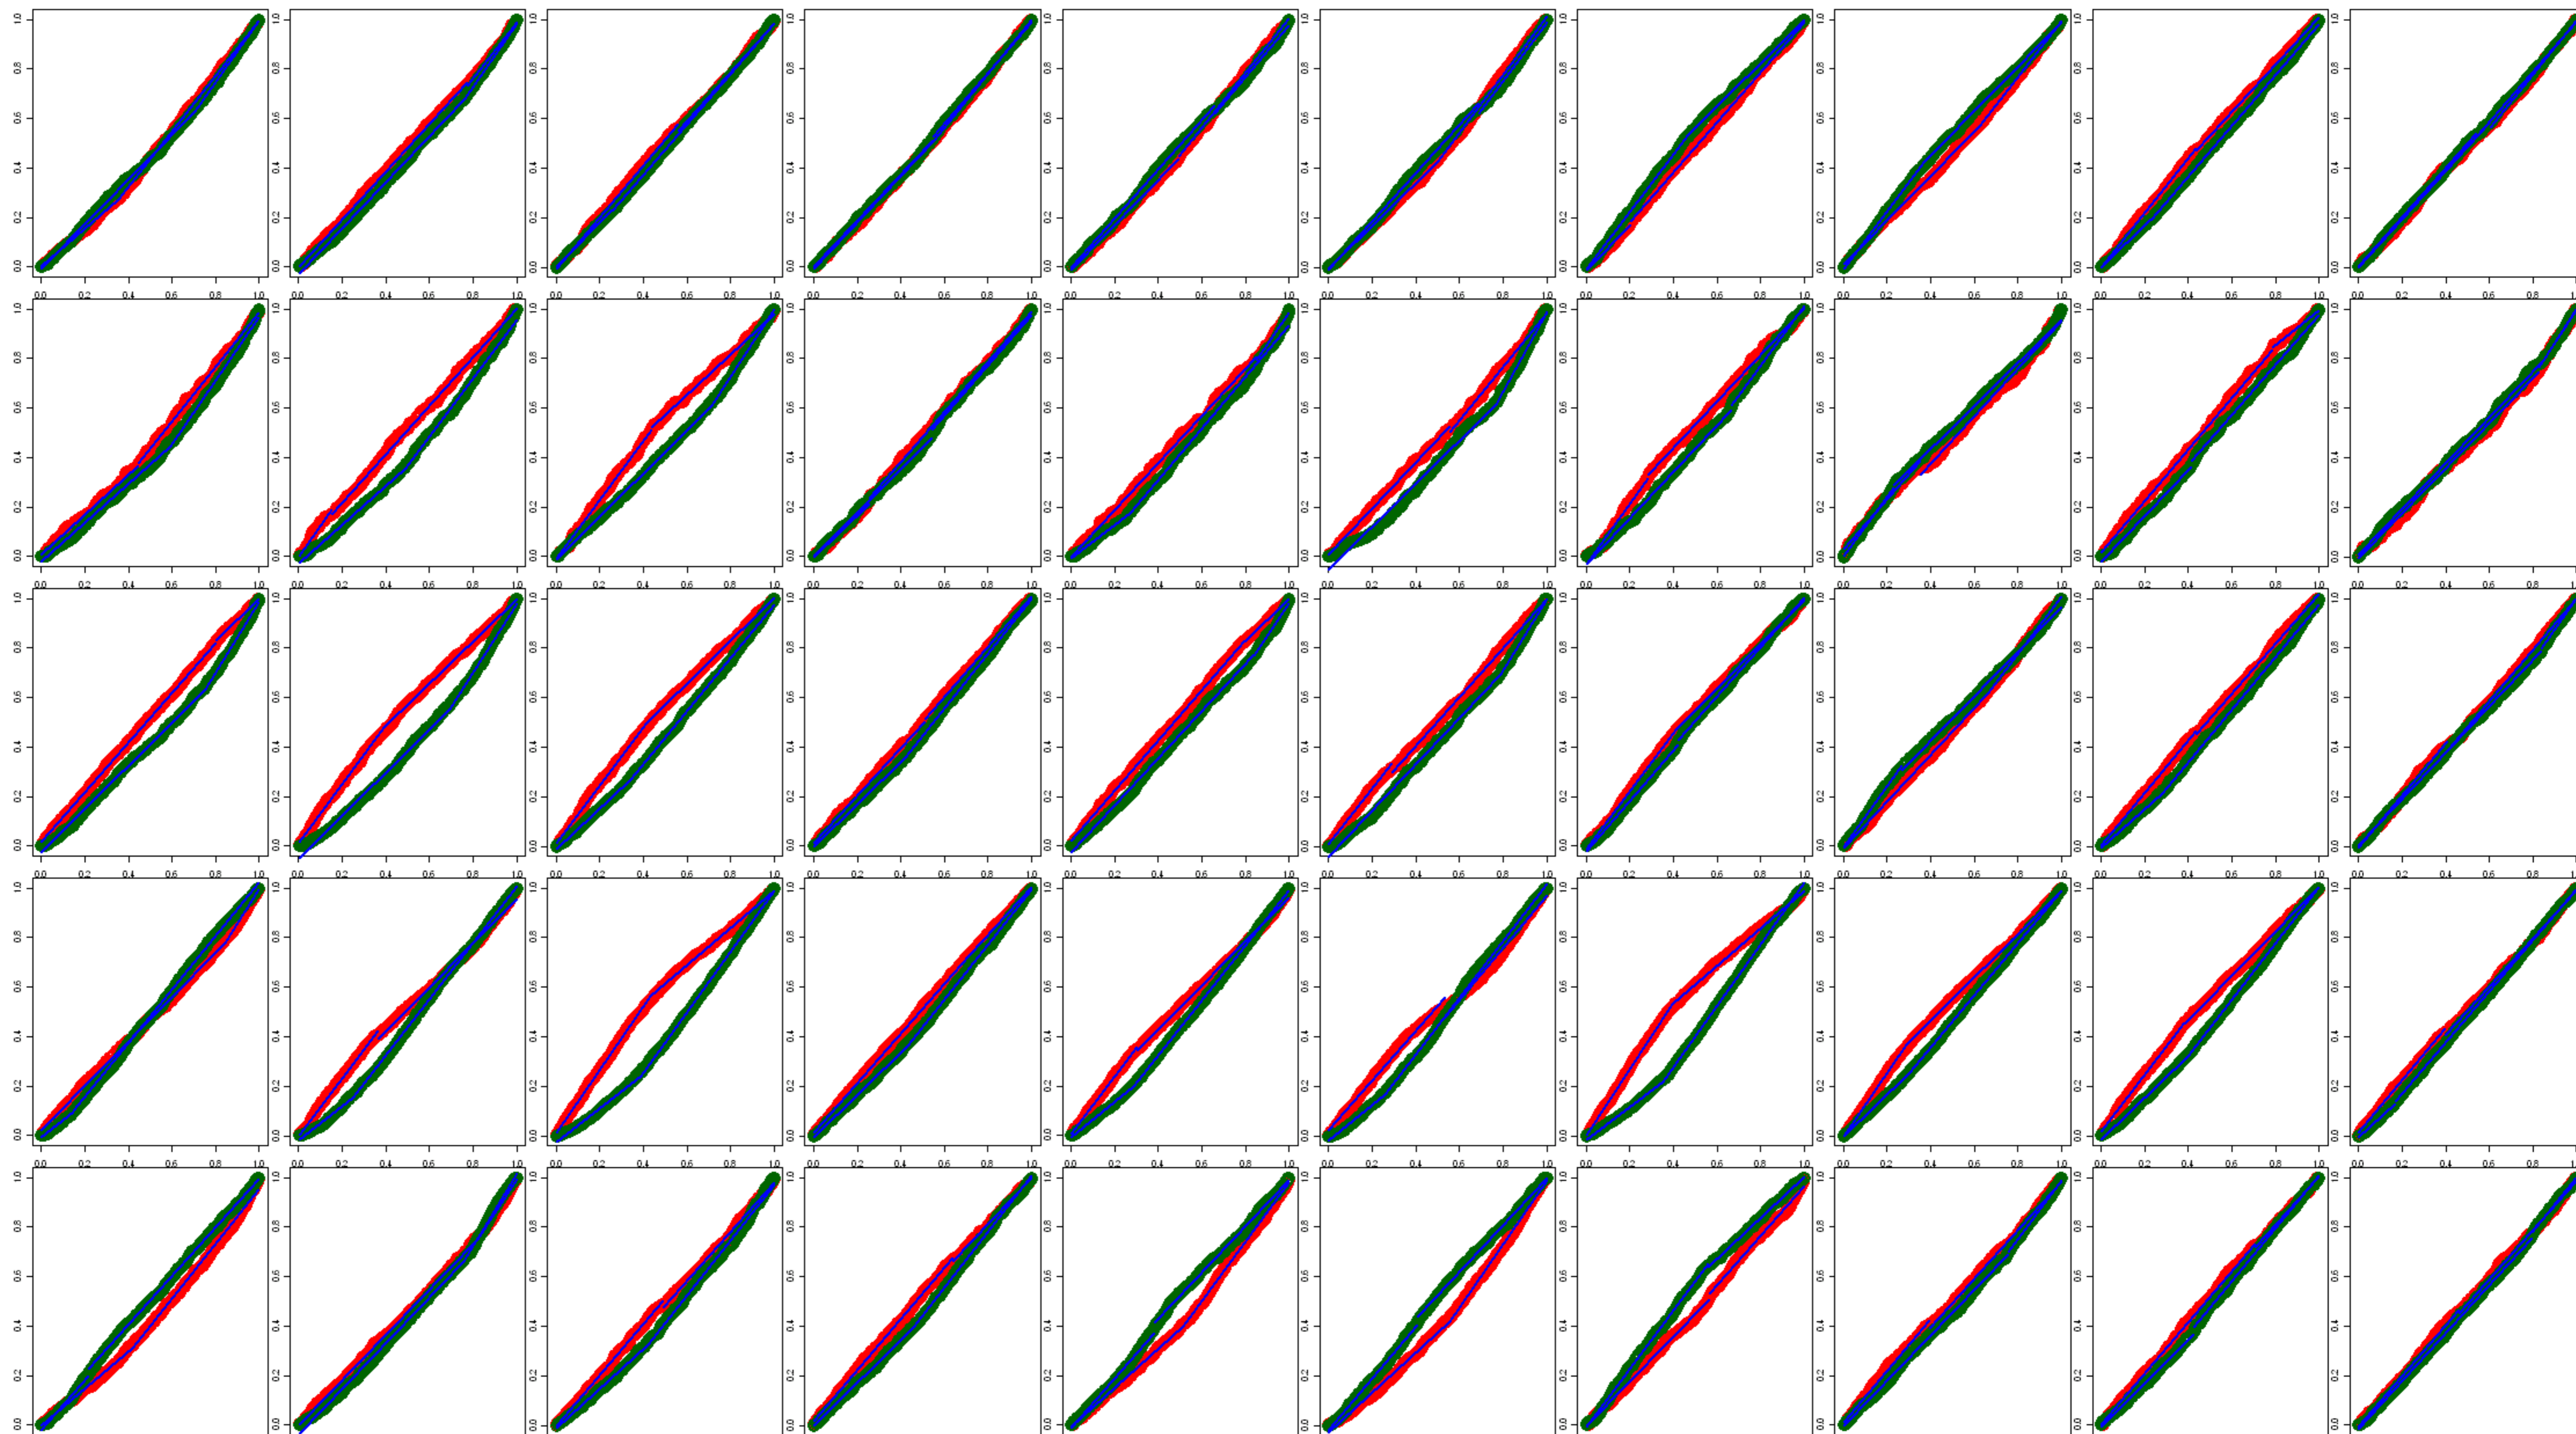

Lung development    Atrial chamber development    Ventricle development    Cerebellum development    Schwann cell development    ES cell differentiation    T cell development    Liver development    Liver regeneration    Ovary development

*Papillary thyroid carcinoma 1 CT*  
Upreg: 632  
Downreg: 411

*Papillary thyroid carcinoma 1 TC*  
Upreg: 587  
Downreg: 383

*Papillary thyroid carcinoma 1 FV*  
Upreg: 779  
Downreg: 485

*Papillary thyroid carcinoma 2*  
Upreg: 503  
Downreg: 468

*Papillary thyroid carcinoma 3*  
Upreg: 84  
Downreg: 103

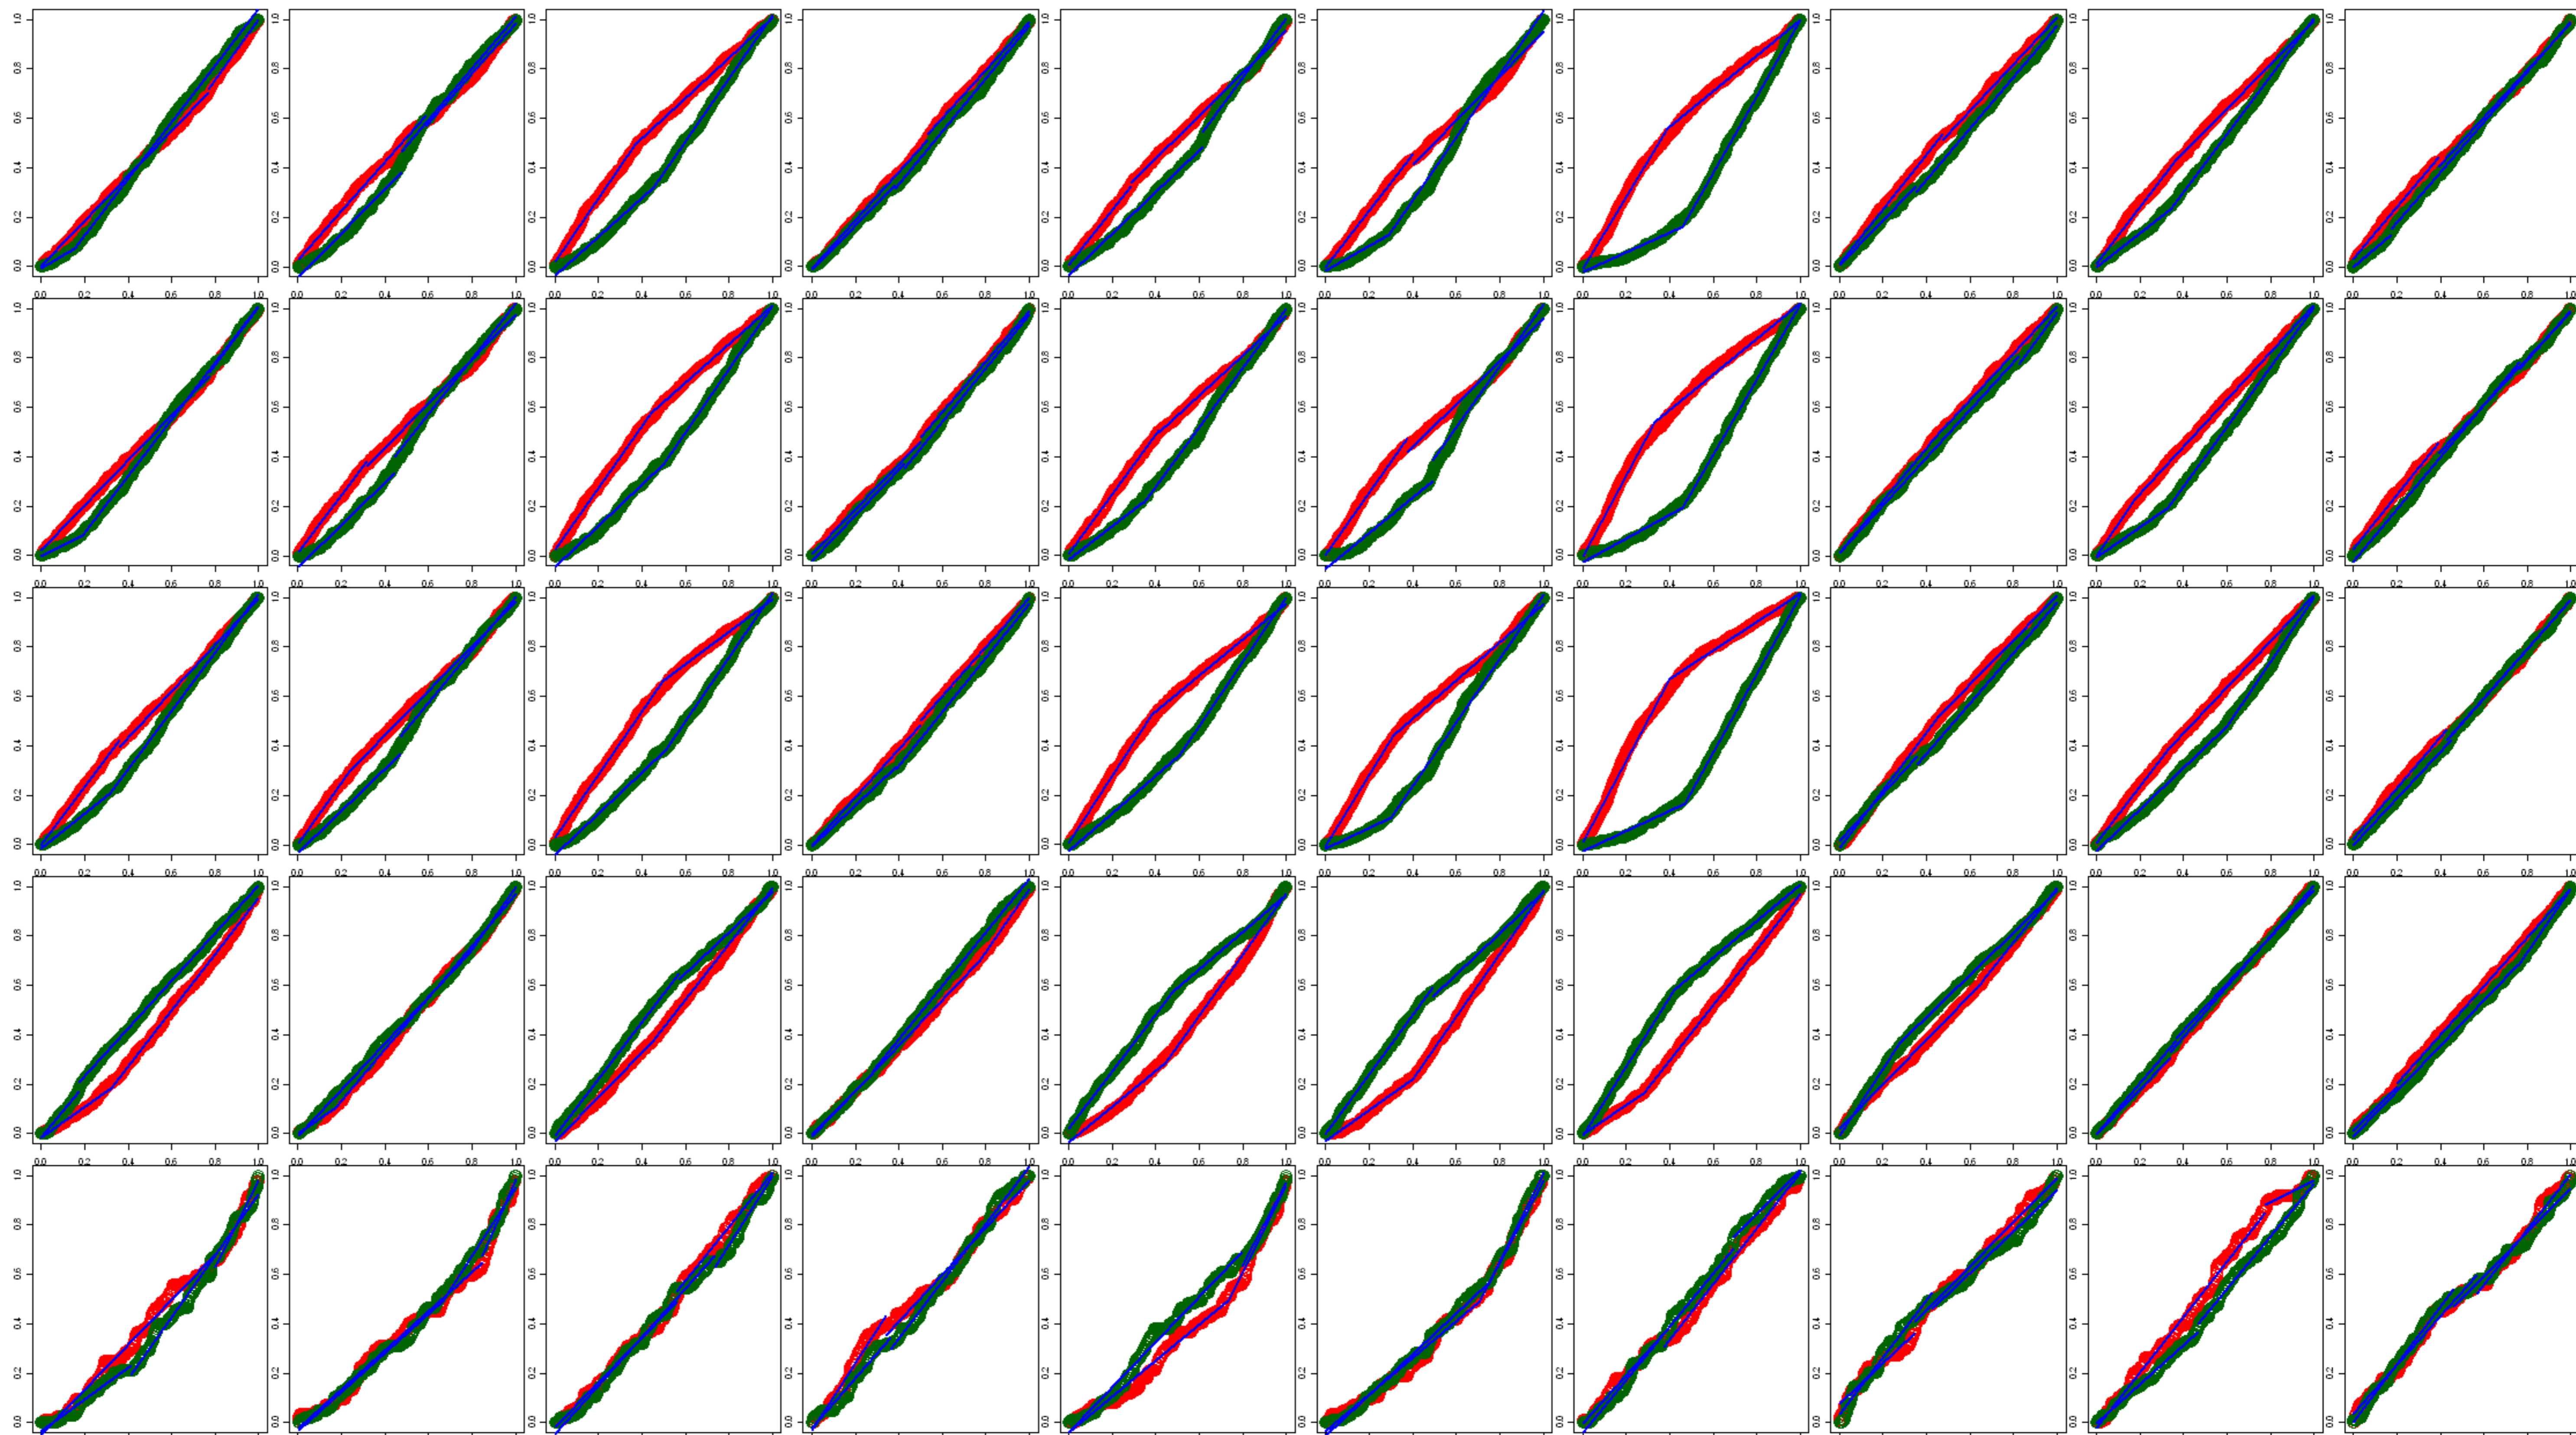

Lung development    Atrial chamber development    Ventricle development    Cerebellum development    Schwann cell development    ES cell differentiation    T cell development    Liver development    Liver regeneration    Ovary development

*Liver cirrhosis*

Upreg: 411  
Downreg: 267

*Dysplastic liver*

Upreg: 154  
Downreg: 133

*Ulcerative colitis*

Upreg: 499  
Downreg: 416

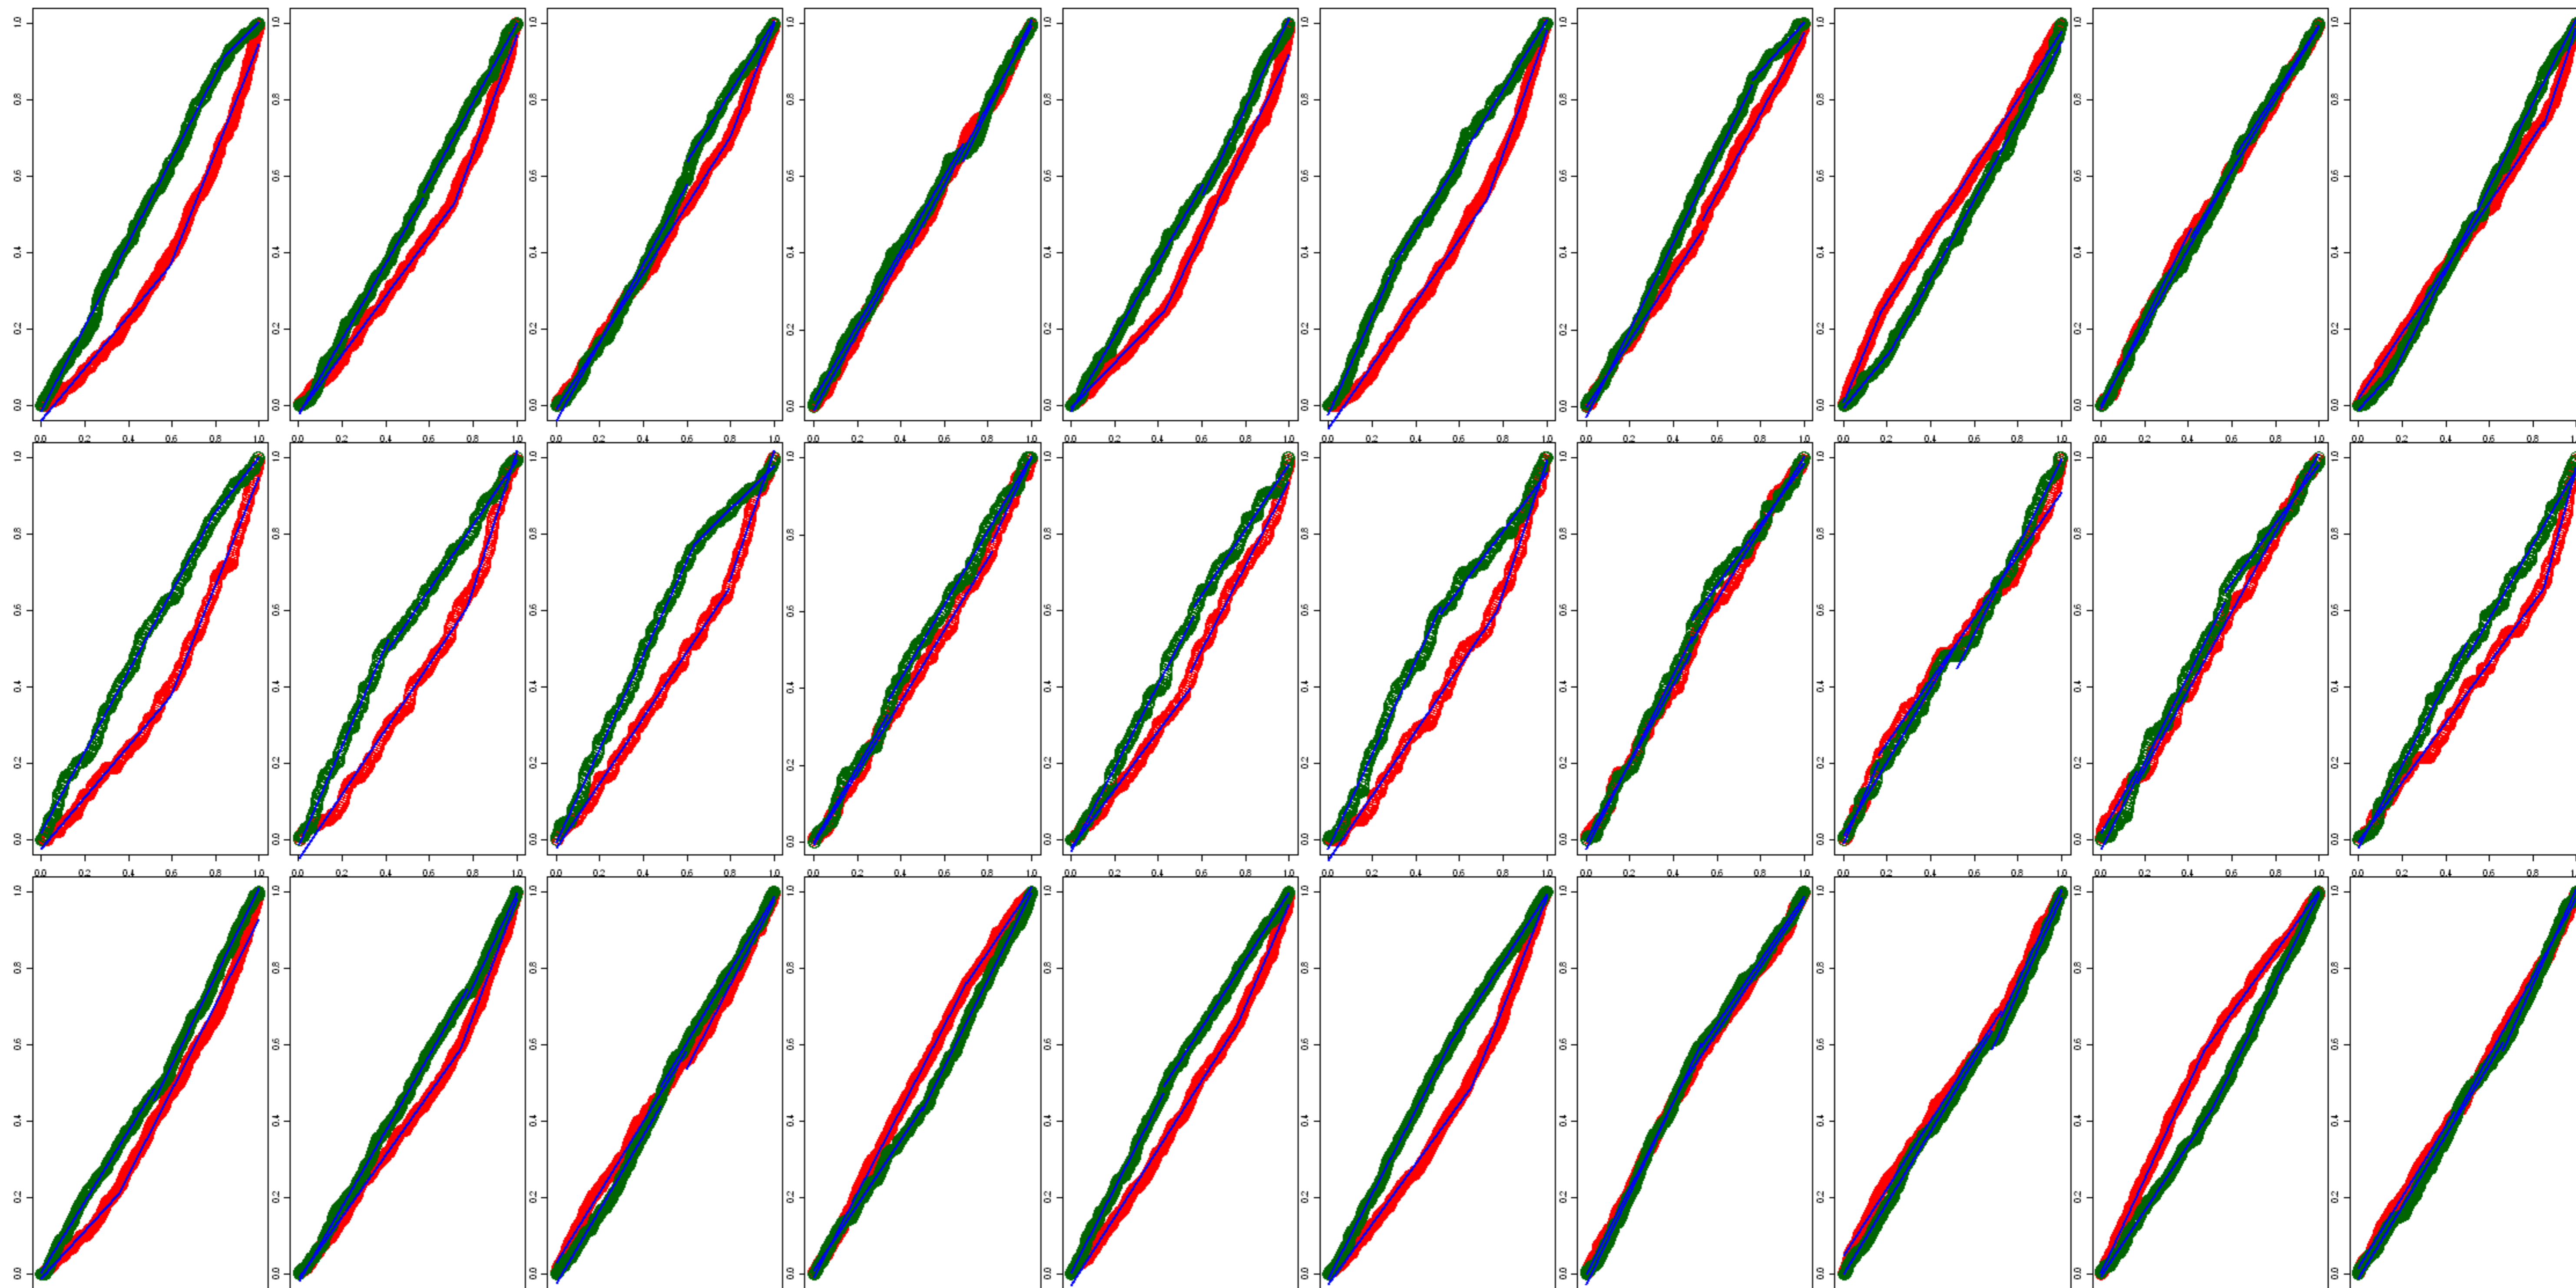

Supplement: Additional file 10 [file gb-2008-9-7-r108-s10.pdf]
